# Supplementary material for: Organic thermally activated delayed fluorescence material with strained benzoguanidine donor
Source: publisher site journal article supplement (doi:10.3762/bjoc.19.95), 2023-09-07
Supplement: Additional file 1 [file 1860-5397-19-95-S1.pdf]

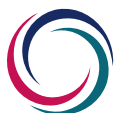

## Supporting Information

for

### **Organic thermally activated delayed fluorescence material with strained benzoguanidine donor**

Alexander C. Brannan, Elvie F. P. Beaumont, Nguyen Le Phuoc,  
George F. S. Whitehead, Mikko Linnolahti and Alexander S. Romanov

*Beilstein J. Org. Chem.* **2023**, *19*, 1289–1298. [doi:10.3762/bjoc.19.95](https://doi.org/10.3762/bjoc.19.95)

## Additional experimental data

|                                                                                                                                                             |       |
|-------------------------------------------------------------------------------------------------------------------------------------------------------------|-------|
| $^1\text{H}$ and $^{13}\text{C}$ NMR, HRMS spectra for <b>4BGIPN</b>                                                                                        | S2–S4 |
| Figure S1. Thermogravimetric analysis (top) and differential scanning calorimetry for <b>4BGIPN</b>                                                         | S5    |
| Figure S2. An overlay of the X-ray crystal structure and optimised $S_0$ geometry of compound <b>4BGIPN</b>                                                 | S6    |
| Figure S3. The deconvolution and estimation of the experimental value for the oscillator strength coefficients associated with the <b>4BGIPN</b> .          | S6    |
| Figure S4. Excitation and emission spectra for <b>4BGIPN</b> in frozen MCH glass at 77 K                                                                    | S7    |
| Photophysical characterisation                                                                                                                              | S8    |
| Table S1. HOMO and LUMO molecular orbitals                                                                                                                  | S8    |
| Table S2. Dipole moments in $S_0$ and $S_1$ states in $S_0$ geometry                                                                                        | S9    |
| Table S3. Vertical excitations $S_0 \rightarrow S_1$ and $S_0 \rightarrow T_n$ , character and oscillator strength coefficients for $S_0 \rightarrow S_1$ . | S9    |
| Table S4. HONTO and LUNTO molecular orbitals of the excited states.                                                                                         | S10   |
| Coordinates for compound <b>4BGIPN</b>                                                                                                                      | S12   |

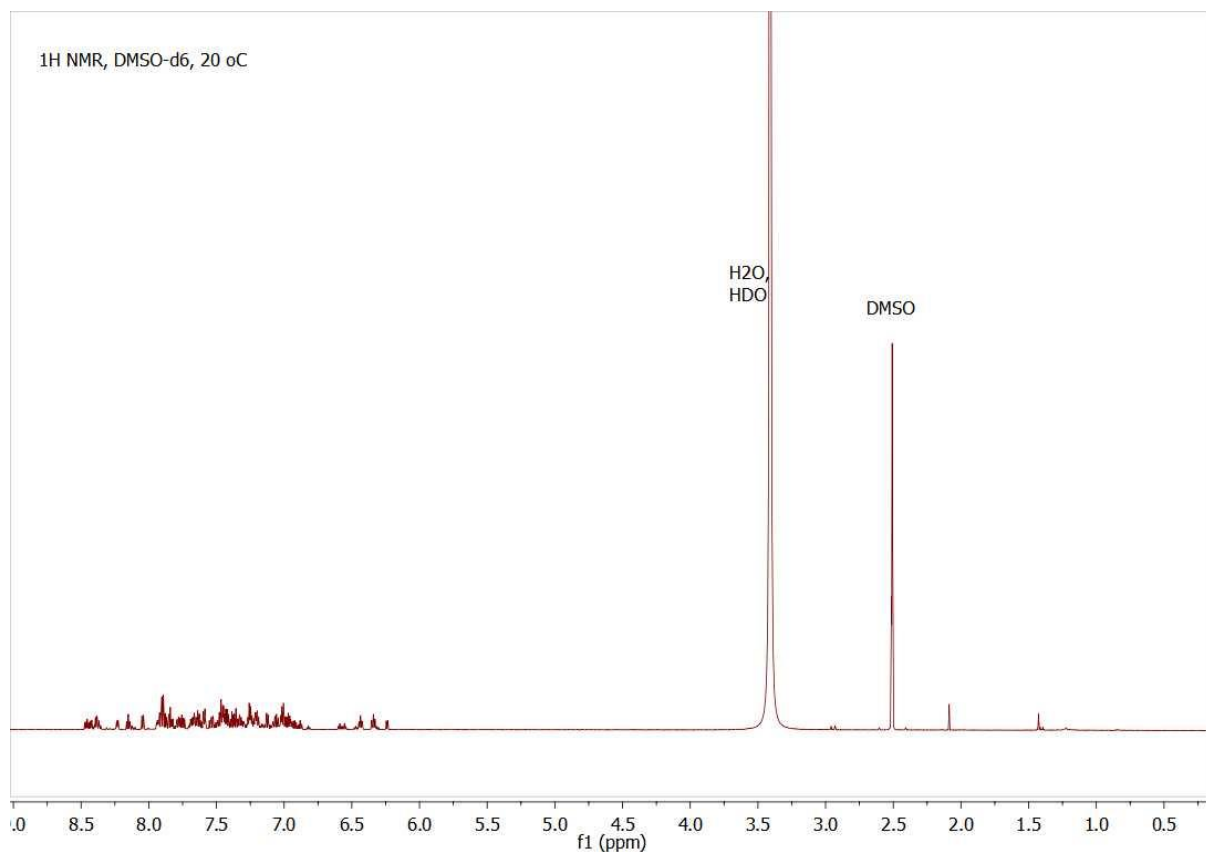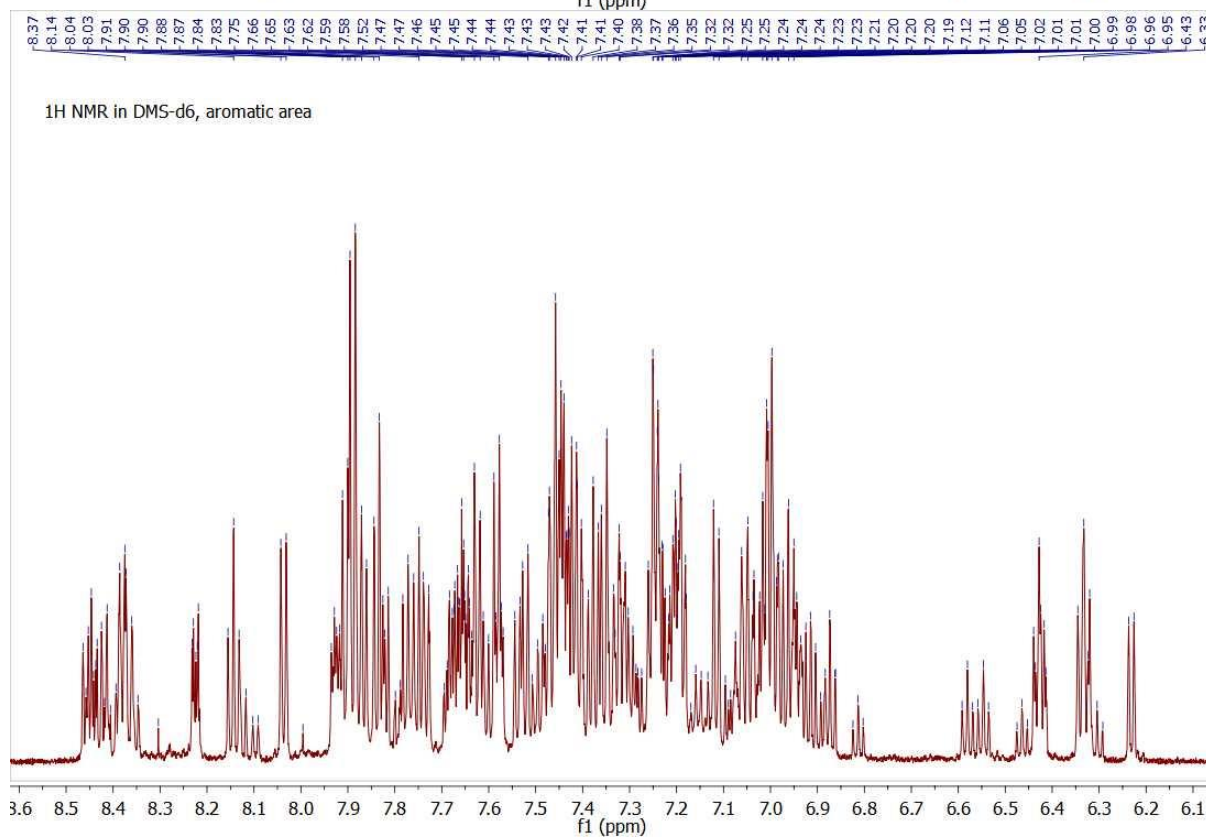

<sup>1</sup>H NMR (700 MHz, DMSO-*d*<sub>6</sub>) spectrum of **4BGIPN**.

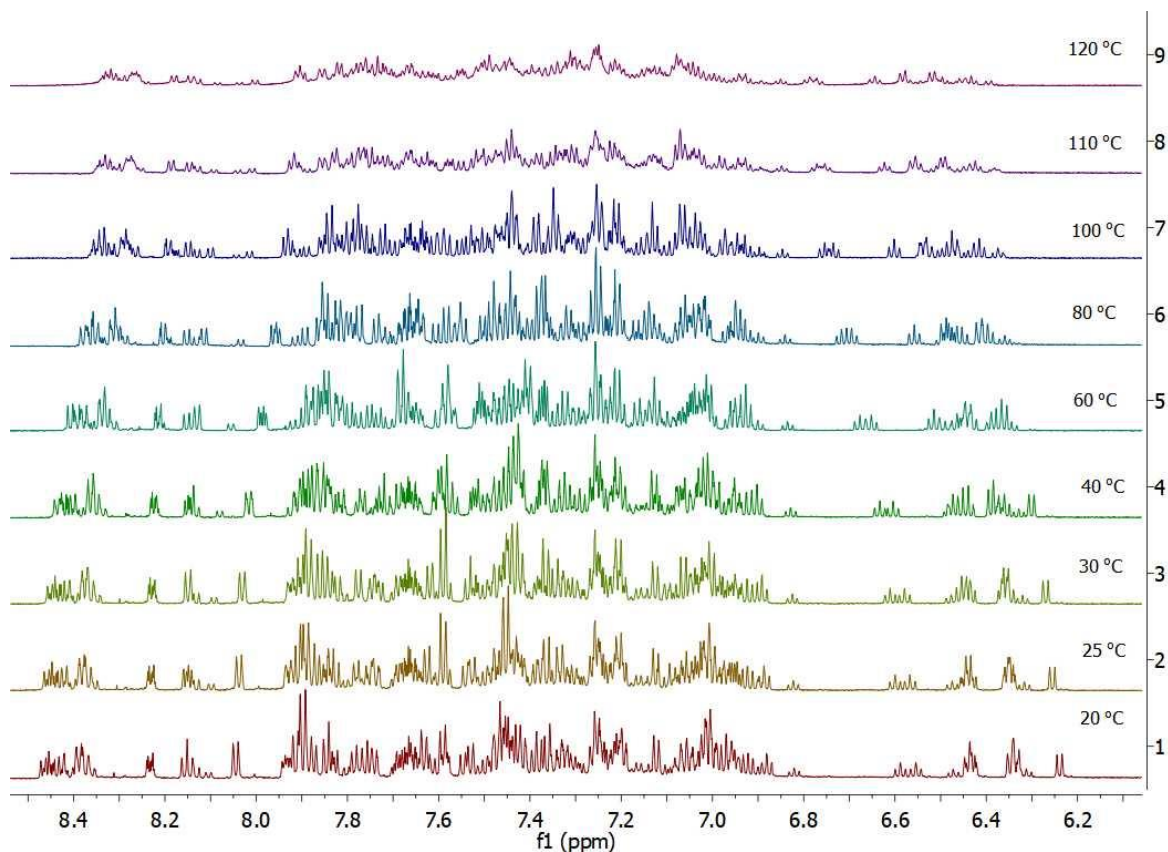

Varied temperature  $^1\text{H}$  NMR (700 MHz,  $\text{DMSO-}d_6$ ) spectra of **4BGIPN** between 20 and 120 °C.

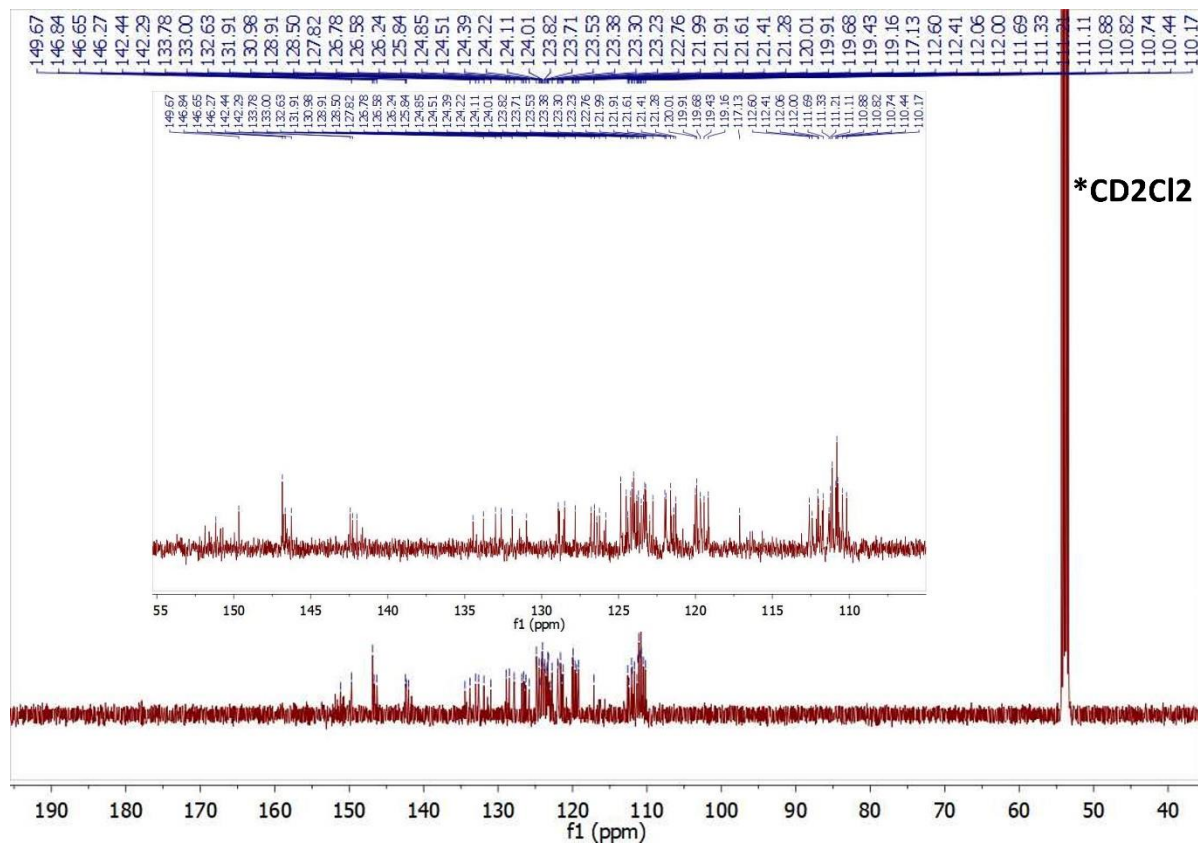

$^{13}\text{C}$  NMR ( $\text{DCM-}d_2$ ) spectrum of **4BGIPN**

60602 #59-75 RT: 0.66-0.85 AV: 17 NL: 3.22E6  
T: FTMS + p ESI Full ms [100.0000-1000.0000]

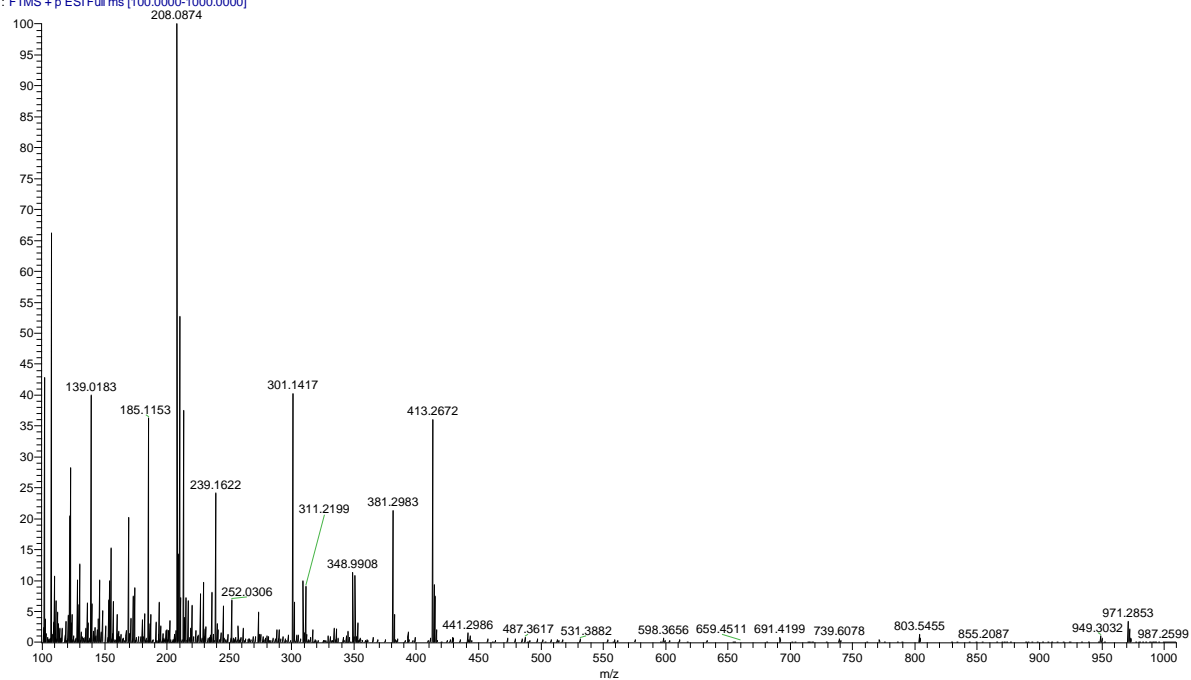

### Full High-Resolution Mass Spectrometry (HRMS).

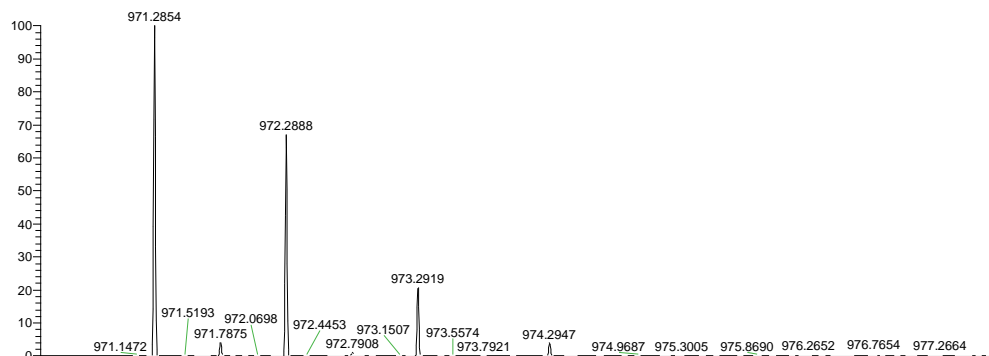

NL:  
5.92E4  
60602#5-113 RT: 0.05-1.30  
AV: 109 T: FTMS + p ESI Full  
ms [100.0000-1000.0000]

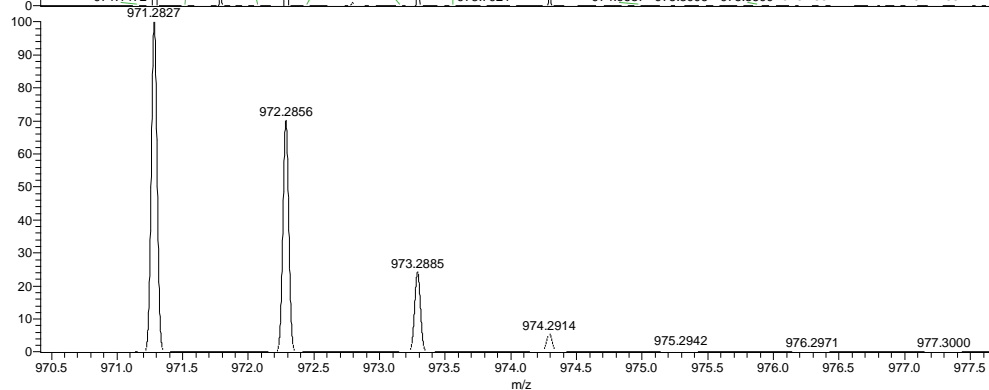

NL:  
1.16E4  
C<sub>20</sub>H<sub>32</sub>N<sub>14</sub>Na:  
C<sub>20</sub>H<sub>32</sub>N<sub>14</sub>Na<sub>1</sub>  
p (gss, s/p:40) Chrg 1  
R: 20000 Res .Pwr. @FWHM

### HRMS Thermo Executive Plus EMR Orbitrab HESI POS and NEG.

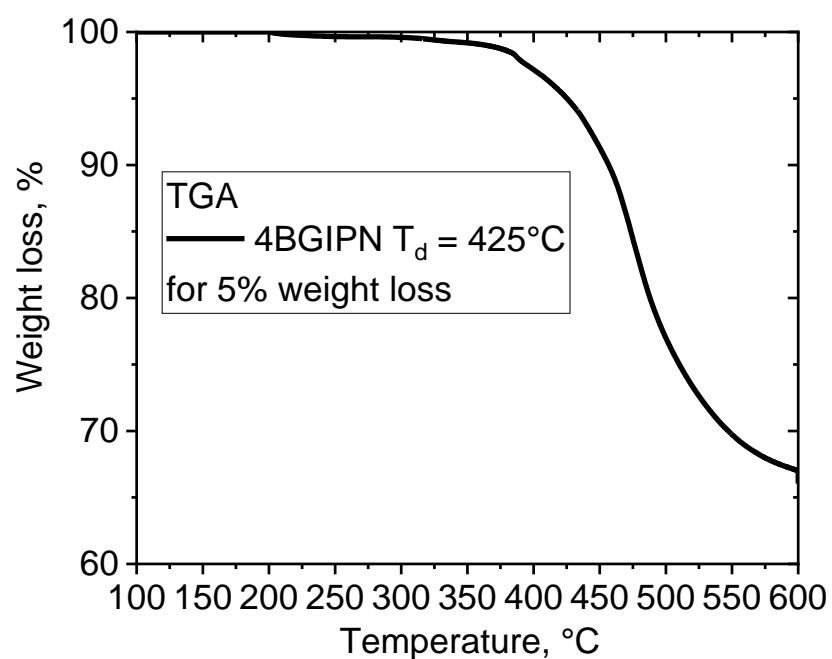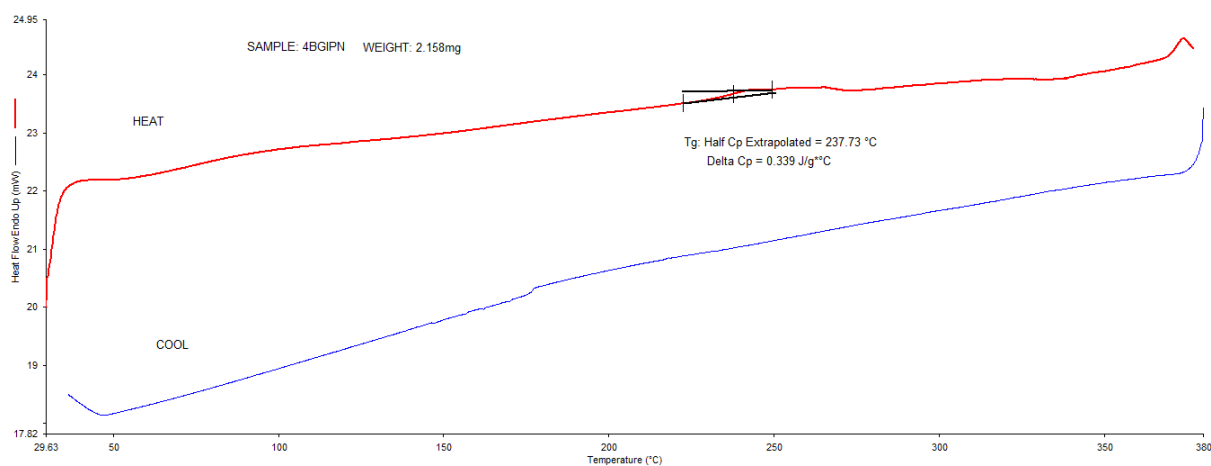

**Figure S1.** Thermogravimetric analysis (top) and differential scanning calorimetry (bottom, glass transition temperature is in the range 237–260 °C) for isomer mixture of compound **4BGIPN**.

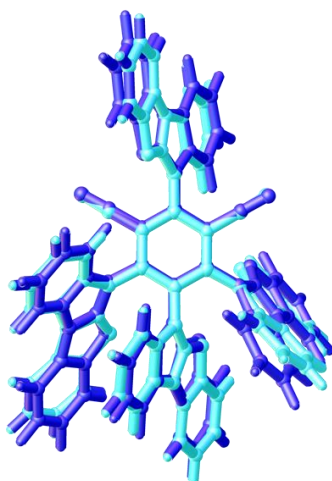

**Figure S2.** An overlay of the X-ray crystal structure and optimised  $S_0$  geometry of compound **4BGIPN**.

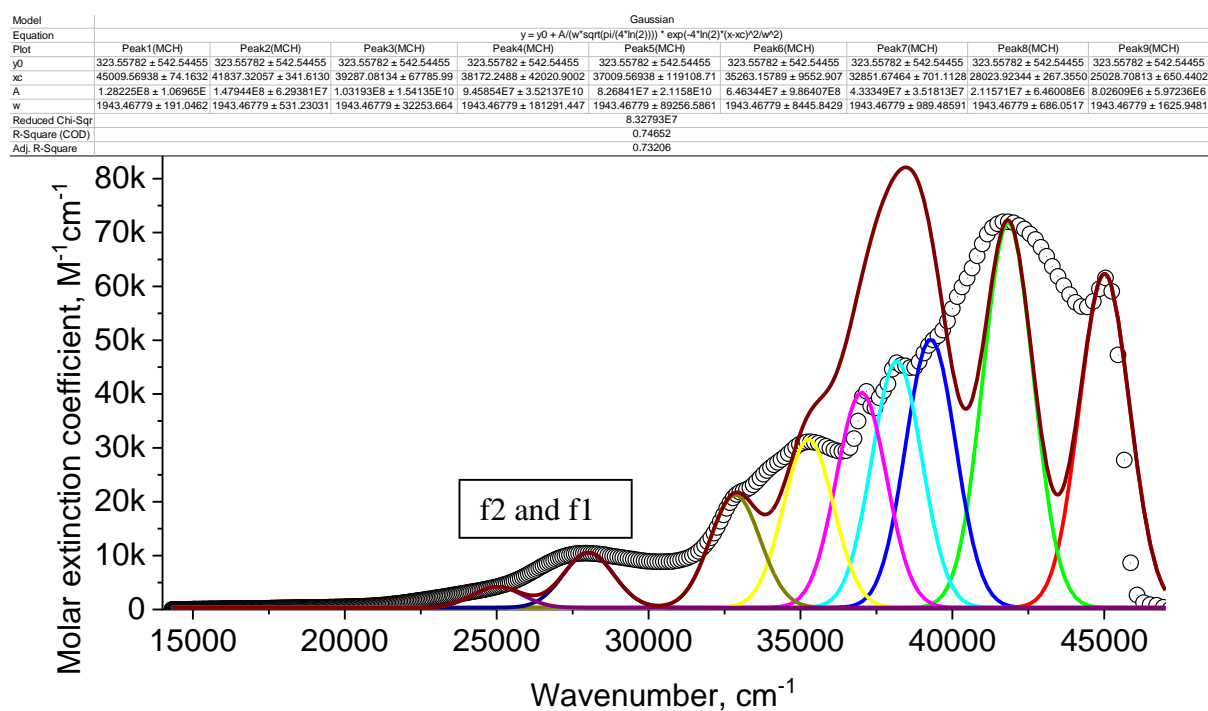

**Figure S3.** The deconvolution and estimation of the experimental value for the oscillator strength coefficients associated with the  $^{lo}CT$  and  $^{de}CT$  bands:

$f_1 = 4,32 \cdot 10^{-9} \int \varepsilon(\bar{\nu}) d(\bar{\nu}) = 4,32 \cdot 10^{-9} \cdot 2.1 \cdot 10^7 (Peak8) = 0.091$  while  $f_2 = 0.034$  based on peak 9. The values are close similar with the theoretically calculated values  $f_1 = 0.091$  while  $f_2 = 0.019$ .

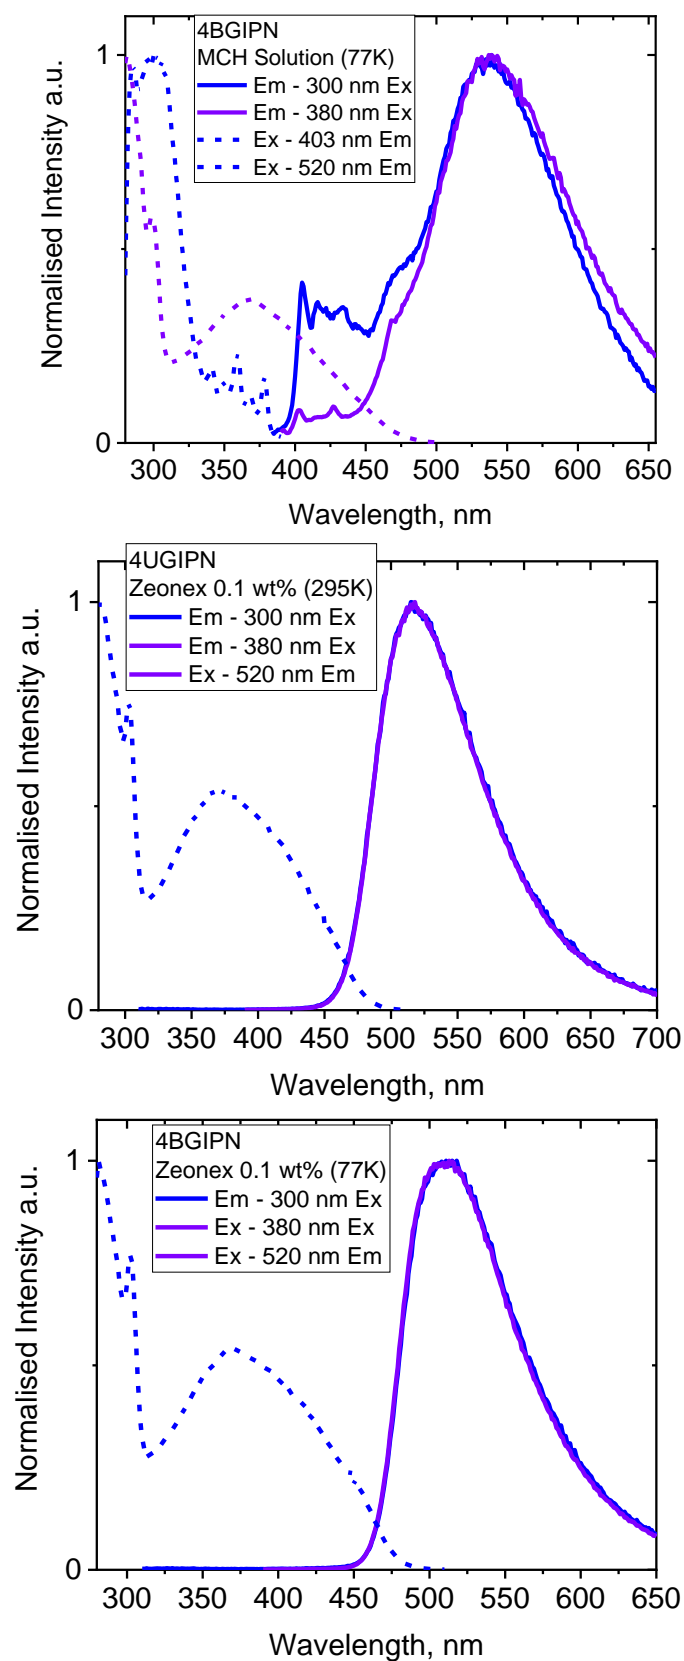

**Figure S4.** Excitation and emission spectra for **4BGIPN** in frozen MCH glass at 77 K (top); Zeonex 0.1 wt % films at 295 K (middle) and 77 K (bottom) with emission and excitation wavelengths in legend.



### Photophysical characterisation.

UV-visible absorption spectra were recorded using a Varian Cary 5000 UV-Vis-NIR spectrometer. Photoluminescence measurements were recorded on an Edinburgh Instruments FLS-1000 spectrometer with a solids mount attachment where appropriate. Absolute photoluminescence quantum yields were recorded using Hamamatsu Quantaury-QY C11347-11. Quantum yields have been measured in air for solid samples and under nitrogen for solutions. Time resolved luminescence data were collected on a time-correlated single photon counting (TCSPC) Edinburgh Instruments FLS-1000 spectrometer using F-900 software. A xenon flash lamp and EPL pulsed diode lasers were used as excitation sources. The collected data were analysed using F-900 software.

### Computational details.

**Table S1.** HOMO and LUMO molecular orbitals in crystal and optimized  $S_0$  geometry.

|                                                                                                                            | HOMO                                                                                | LUMO                                                                                  |
|----------------------------------------------------------------------------------------------------------------------------|-------------------------------------------------------------------------------------|---------------------------------------------------------------------------------------|
| 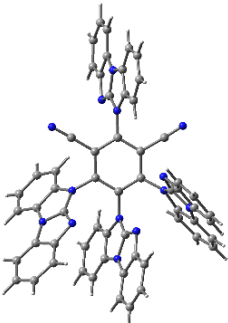<br>(crystal)<br>Overlap integral: 0.27 |  |  |
| <br>(opt)<br>Overlap integral: 0.29     |  |  |

**Tables S2.** Dipole moments in  $S_0$  and  $S_1$  states in crystal and optimized  $S_0$  geometry.

|           | $S_0$                                                                                      | $S_1$                                                                                        |
|-----------|--------------------------------------------------------------------------------------------|----------------------------------------------------------------------------------------------|
| (crystal) | 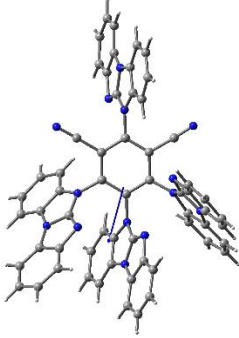<br>6.7D  | <br>13.6D |
| (opt)     | <br>6.4D | <br>7.2D |

**Table S3.** Vertical excitations  $S_0 \rightarrow S_n$  and  $S_0 \rightarrow T_n$ , character and oscillator strength coefficients for  $S_0 \rightarrow S_n$  in crystal and optimized  $S_0$  geometry.

|           | Excitation energy      | Character                                                       | Oscillator strength |
|-----------|------------------------|-----------------------------------------------------------------|---------------------|
| (crystal) | $S_1$ : 3.11eV = 399nm | HOMO – LUMO (92%)                                               | 0.0773              |
|           | $S_2$ : 3.28eV = 378nm | HOMO-1 – LUMO (83%)                                             | 0.0341              |
|           | $S_3$ : 3.42eV = 363nm | HOMO-2 – LUMO (59%)                                             | 0.0131              |
|           | $T_1$ : 2.94eV = 422nm | HOMO – LUMO (71%)                                               |                     |
|           | $T_2$ : 3.09eV = 402nm | HOMO-2 – LUMO (19%)<br>HOMO-1 – LUMO (19%)                      |                     |
|           | $T_3$ : 3.13eV = 396nm | HOMO-2 – LUMO (47%)                                             |                     |
| (opt)     | $S_1$ : 3.19eV = 388nm | HOMO – LUMO (78%)                                               | 0.0906              |
|           | $S_2$ : 3.28eV = 378nm | HOMO-1 – LUMO (78%)                                             | 0.0190              |
|           | $S_3$ : 3.42eV = 363nm | HOMO-2 – LUMO (81%)                                             | 0.0408              |
|           | $T_1$ : 2.99eV = 415nm | HOMO – LUMO (46%)<br>HOMO-1 – LUMO (18%)                        |                     |
|           | $T_2$ : 3.05eV = 406nm | HOMO – LUMO (35%)<br>HOMO-3 – LUMO (19%)<br>HOMO – LUMO+1 (16%) |                     |
|           | $T_3$ : 3.18eV = 389nm | HOMO-1 – LUMO (50%)<br>HOMO – LUMO+1 (31%)                      |                     |

**Table S4.** HONTO and LUNTO molecular orbitals of the excited states in crystal and optimized  $S_0$  geometry.

|           |       | HONTO | LUNTO |
|-----------|-------|-------|-------|
| (crystal) | $S_1$ |       |       |
|           | $S_2$ |       |       |
|           | $S_3$ |       |       |
|           | $T_1$ |       |       |

|       |                |                                                                                     |                                                                                       |
|-------|----------------|-------------------------------------------------------------------------------------|---------------------------------------------------------------------------------------|
|       | T <sub>2</sub> | 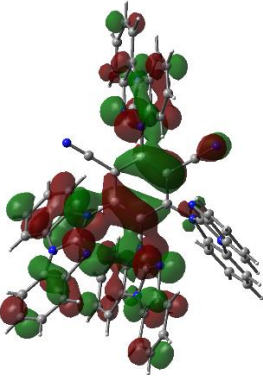   |    |
|       | T <sub>3</sub> |    |    |
| (opt) | S <sub>1</sub> |   |   |
|       | S <sub>2</sub> |  |  |
|       | S <sub>3</sub> |  |  |

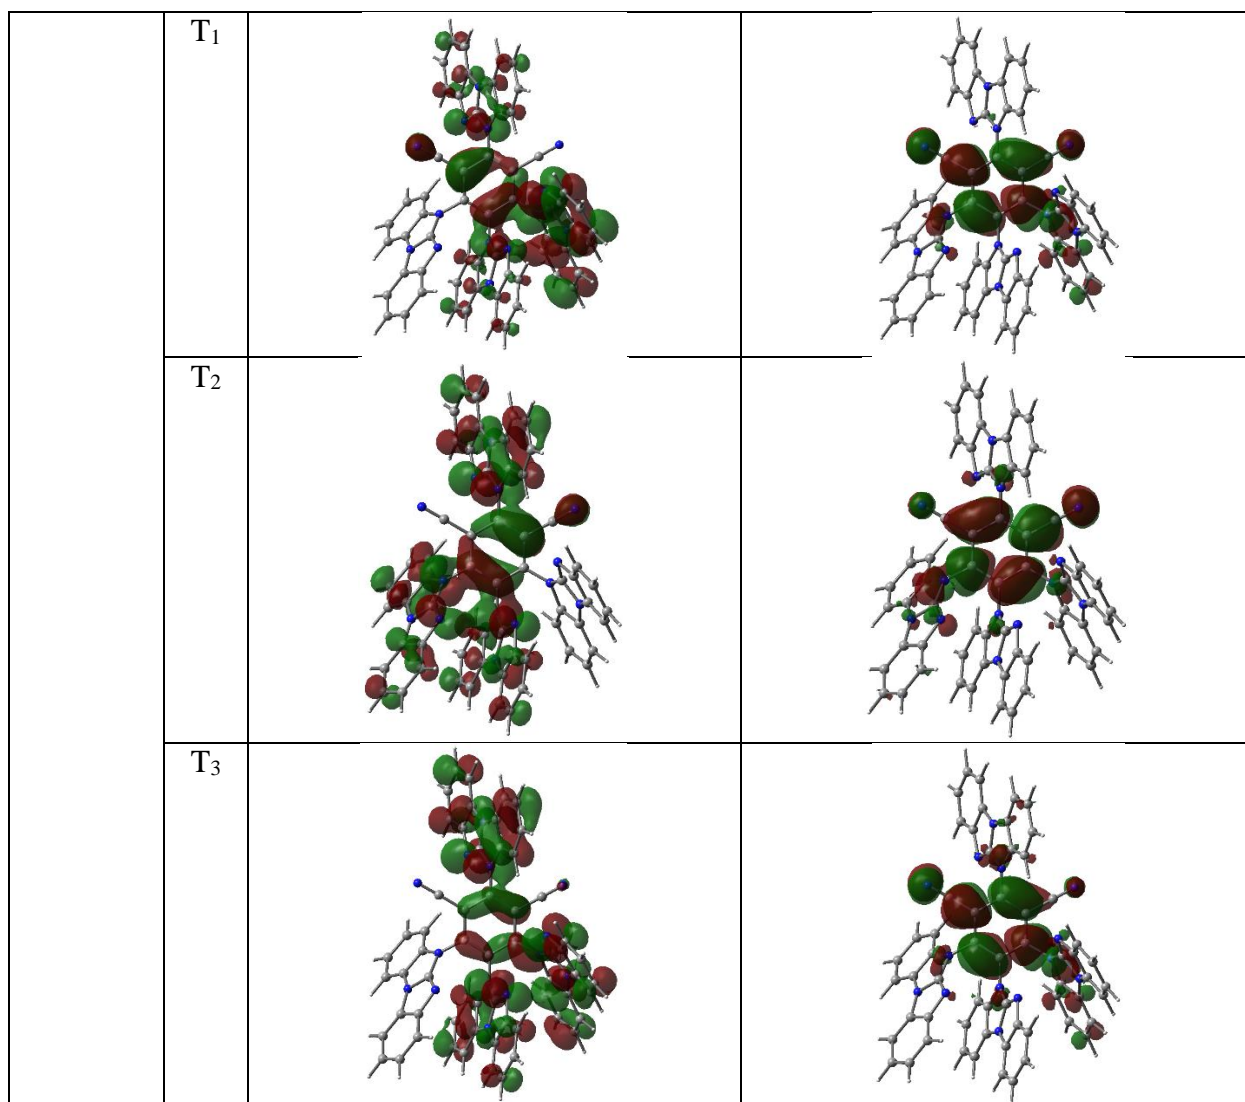

**Coordinates for compound 4BGIPN in the ground state S<sub>0</sub> geometry (crystal geometry).**

|   |             |             |             |
|---|-------------|-------------|-------------|
| N | 14.31500000 | 9.19000000  | 7.14100000  |
| N | 10.55200000 | 13.38100000 | 7.44200000  |
| N | 9.72700000  | 10.69700000 | 6.79700000  |
| N | 7.74300000  | 9.98600000  | 7.53600000  |
| N | 9.48500000  | 9.18400000  | 8.75300000  |
| N | 8.82600000  | 12.44200000 | 8.95700000  |
| N | 13.24800000 | 13.72600000 | 8.36300000  |
| N | 8.97500000  | 14.65100000 | 8.38400000  |
| N | 11.54000000 | 14.19500000 | 10.08800000 |
| N | 15.93700000 | 10.16600000 | 5.55500000  |
| N | 16.09200000 | 8.04800000  | 6.42700000  |
| N | 13.14800000 | 15.68000000 | 9.45200000  |
| C | 12.01500000 | 10.00100000 | 6.90600000  |
| C | 9.07200000  | 9.90900000  | 7.74300000  |
| C | 11.49300000 | 12.32100000 | 7.39700000  |
| N | 16.02600000 | 11.63900000 | 8.94600000  |
| C | 7.15400000  | 9.27800000  | 8.56500000  |

|   |             |             |             |
|---|-------------|-------------|-------------|
| C | 11.08200000 | 11.03100000 | 7.01200000  |
| C | 12.82500000 | 12.50700000 | 7.81300000  |
| C | 8.74500000  | 11.32800000 | 6.02600000  |
| N | 11.31800000 | 7.70900000  | 5.92100000  |
| C | 9.45200000  | 13.37800000 | 8.28800000  |
| C | 12.56200000 | 14.45100000 | 9.32700000  |
| C | 13.35100000 | 10.20600000 | 7.26800000  |
| C | 15.01900000 | 11.56300000 | 8.37900000  |
| C | 8.24900000  | 8.78500000  | 9.30700000  |
| C | 13.73100000 | 11.46500000 | 7.76200000  |
| C | 11.60400000 | 8.73400000  | 6.34900000  |
| C | 15.43700000 | 9.28700000  | 6.34200000  |
| C | 7.49200000  | 10.84800000 | 6.48100000  |
| C | 14.26900000 | 14.57500000 | 7.86000000  |
| C | 10.76800000 | 14.72000000 | 7.04200000  |
| C | 7.82000000  | 13.17900000 | 9.59500000  |
| C | 14.28400000 | 7.90200000  | 7.71400000  |
| C | 9.81600000  | 15.52700000 | 7.66900000  |
| C | 6.83300000  | 12.72200000 | 10.44800000 |
| H | 6.75900000  | 11.80200000 | 10.67300000 |
| C | 8.02300000  | 7.99700000  | 10.42100000 |
| H | 8.74900000  | 7.65100000  | 10.92700000 |
| C | 7.89100000  | 14.55400000 | 9.26500000  |
| C | 8.84000000  | 12.17900000 | 4.93900000  |
| H | 9.67800000  | 12.51600000 | 4.64300000  |
| C | 11.70800000 | 15.27000000 | 6.19400000  |
| H | 12.34200000 | 14.72800000 | 5.73800000  |
| C | 15.37400000 | 7.20800000  | 7.27000000  |
| C | 5.66100000  | 8.20200000  | 10.03500000 |
| H | 4.77700000  | 7.98400000  | 10.30800000 |
| C | 11.39700000 | 15.40800000 | 10.79100000 |
| C | 14.21200000 | 15.80400000 | 8.52200000  |
| C | 6.33500000  | 11.19100000 | 5.82400000  |
| H | 5.48900000  | 10.86900000 | 6.11500000  |
| C | 17.04200000 | 9.45900000  | 5.01400000  |
| C | 6.44300000  | 12.03000000 | 4.71300000  |
| H | 5.65700000  | 12.26300000 | 4.23300000  |
| C | 15.18900000 | 14.36900000 | 6.82800000  |
| H | 15.25300000 | 13.54100000 | 6.36600000  |
| C | 5.94800000  | 13.66700000 | 10.96200000 |
| H | 5.27300000  | 13.38000000 | 11.56600000 |
| C | 7.03500000  | 15.49100000 | 9.77600000  |
| H | 7.11900000  | 16.41600000 | 9.57300000  |
| C | 5.84200000  | 8.98400000  | 8.91200000  |
| H | 5.10700000  | 9.30400000  | 8.40300000  |
| C | 6.73000000  | 7.72600000  | 10.77700000 |
| H | 6.56100000  | 7.20000000  | 11.55000000 |
| C | 17.15000000 | 8.16300000  | 5.53400000  |
| C | 6.01300000  | 14.99400000 | 10.62700000 |
| H | 5.36300000  | 15.59400000 | 10.97400000 |

|   |             |             |             |
|---|-------------|-------------|-------------|
| C | 9.78200000  | 16.87200000 | 7.50600000  |
| H | 9.12600000  | 17.40500000 | 7.93900000  |
| C | 7.64200000  | 12.52100000 | 4.29800000  |
| H | 7.66800000  | 13.11100000 | 3.55400000  |
| C | 10.46100000 | 15.76700000 | 11.74600000 |
| H | 9.78000000  | 15.16100000 | 12.01200000 |
| C | 15.63300000 | 5.86600000  | 7.66900000  |
| H | 16.37400000 | 5.36100000  | 7.35600000  |
| C | 12.39600000 | 16.34100000 | 10.41600000 |
| C | 11.68500000 | 16.64200000 | 6.03800000  |
| H | 12.33000000 | 17.05600000 | 5.47800000  |
| C | 10.74100000 | 17.43200000 | 6.68300000  |
| H | 10.75400000 | 18.37400000 | 6.55700000  |
| C | 17.97100000 | 9.91300000  | 4.07800000  |
| H | 17.93800000 | 10.79500000 | 3.72300000  |
| C | 10.54300000 | 17.01500000 | 12.29700000 |
| H | 9.91800000  | 17.26000000 | 12.96700000 |
| C | 11.50000000 | 17.93100000 | 11.91500000 |
| H | 11.50000000 | 18.79900000 | 12.29800000 |
| C | 16.00200000 | 15.45300000 | 6.52400000  |
| H | 16.62900000 | 15.35800000 | 5.81600000  |
| C | 13.38000000 | 7.35200000  | 8.59900000  |
| H | 12.61700000 | 7.83300000  | 8.89900000  |
| C | 15.05200000 | 16.84200000 | 8.24400000  |
| H | 15.03200000 | 17.65400000 | 8.73600000  |
| C | 12.48100000 | 17.58700000 | 10.95800000 |
| H | 13.16600000 | 18.19500000 | 10.70600000 |
| C | 19.02100000 | 7.69900000  | 4.24000000  |
| H | 19.71000000 | 7.11400000  | 3.94400000  |
| C | 18.14500000 | 7.25200000  | 5.17000000  |
| H | 18.20300000 | 6.38300000  | 5.54700000  |
| C | 13.64700000 | 6.03800000  | 9.03500000  |
| H | 13.07500000 | 5.62500000  | 9.66900000  |
| C | 18.95600000 | 8.99100000  | 3.69600000  |
| H | 19.60000000 | 9.24900000  | 3.04600000  |
| C | 15.95000000 | 16.63600000 | 7.18100000  |
| H | 16.53200000 | 17.34100000 | 6.91800000  |
| C | 14.69900000 | 5.37300000  | 8.56000000  |
| H | 14.81900000 | 4.48000000  | 8.86200000  |

**Coordinates for compound 4BGIPN in the ground state  $S_0$  geometry (optimized geometry).**

|   |             |             |             |
|---|-------------|-------------|-------------|
| N | 3.83442600  | 0.90870300  | -0.29780500 |
| N | -1.50230400 | -0.52172100 | 0.65031500  |
| N | -0.54057900 | 2.03640200  | 1.38865100  |
| N | -2.02326100 | 3.70084800  | 1.16456000  |
| N | -0.36054800 | 3.76416300  | -0.37286600 |
| N | -2.68040900 | 1.27132700  | -0.57465100 |
| N | 0.28696900  | -2.33182700 | -0.65743800 |
| N | -3.70099500 | -0.56708400 | 0.26534200  |

|   |             |             |             |
|---|-------------|-------------|-------------|
| N | -1.85021900 | -1.91604700 | -1.84132600 |
| N | 5.04490800  | -1.00589500 | 0.69914400  |
| N | 6.05642500  | 0.74200300  | -0.32996600 |
| N | -1.16351300 | -3.95898100 | -1.15101700 |
| C | 1.64414000  | 1.43409500  | 0.60414200  |
| C | -0.85532500 | 3.18418900  | 0.66862000  |
| C | -0.15923300 | -0.18673000 | 0.43780100  |
| N | 3.43521500  | -2.11770300 | -2.11996000 |
| C | -2.37082900 | 4.72234800  | 0.29119800  |
| C | 0.30649200  | 1.07789400  | 0.81955000  |
| C | 0.71112600  | -1.06550000 | -0.22705000 |
| C | -1.57814100 | 1.84042000  | 2.32279800  |
| N | 2.58001900  | 3.58120700  | 1.69188600  |
| C | -2.55406200 | 0.15899500  | 0.06996500  |
| C | -0.92244800 | -2.61304700 | -1.26797800 |
| C | 2.50160100  | 0.56563000  | -0.07060500 |
| C | 2.82188800  | -1.48119100 | -1.38120600 |
| C | -1.31154600 | 4.74904300  | -0.64703000 |
| C | 2.02334500  | -0.67187100 | -0.51165900 |
| C | 2.15008200  | 2.64010800  | 1.18556800  |
| C | 4.90542300  | 0.11638500  | 0.06799500  |
| C | -2.51542900 | 2.87437400  | 2.16721500  |
| C | 0.80584600  | -3.55752900 | -0.17141500 |
| C | -2.02293100 | -1.69785500 | 1.21251600  |
| C | -4.04594900 | 1.30792700  | -0.85426900 |
| C | 4.34873700  | 2.05799600  | -0.93584100 |
| C | -3.40397500 | -1.74127100 | 0.94481300  |
| C | -4.77766300 | 2.28639400  | -1.51968800 |
| H | -4.28099200 | 3.17104000  | -1.90090000 |
| C | -1.34667300 | 5.67694200  | -1.68227800 |
| H | -0.54657300 | 5.71179100  | -2.40976500 |
| C | -4.70974200 | 0.16327100  | -0.35022500 |
| C | -1.74900400 | 0.85408600  | 3.27227000  |
| H | -1.01696600 | 0.06545600  | 3.39977800  |
| C | -1.40068900 | -2.69523800 | 1.93595500  |
| H | -0.34290100 | -2.64702800 | 2.16784500  |
| C | 5.74846200  | 1.94854800  | -0.95596100 |
| C | -3.47440100 | 6.48812100  | -0.82268200 |
| H | -4.30699700 | 7.17295000  | -0.91827500 |
| C | -2.84145800 | -2.86517100 | -2.08329300 |
| C | -0.11428400 | -4.57284400 | -0.47623800 |
| C | -3.66516200 | 2.91903100  | 2.93185000  |
| H | -4.39282100 | 3.70876500  | 2.80375000  |
| C | 6.43197700  | -1.16250600 | 0.72938900  |
| C | -3.85405200 | 1.90316500  | 3.86694300  |
| H | -4.74852100 | 1.90559800  | 4.47556700  |
| C | 1.95256600  | -3.81980800 | 0.55299200  |
| H | 2.67051400  | -3.04482900 | 0.79758900  |
| C | -6.14178500 | 2.08549400  | -1.67675300 |
| H | -6.73092100 | 2.83081900  | -2.19587400 |



|   |             |             |             |
|---|-------------|-------------|-------------|
| C | -6.07028900 | -0.04579400 | -0.50869200 |
| H | -6.56019900 | -0.93267600 | -0.12739000 |
| C | -3.45718800 | 5.57950900  | 0.22685500  |
| H | -4.26026700 | 5.53953400  | 0.95123300  |
| C | -2.43441000 | 6.53496500  | -1.75811600 |
| H | -2.48306900 | 7.25915300  | -2.56143500 |
| C | 7.09092800  | -0.08123700 | 0.09661200  |
| C | -6.77779200 | 0.93882000  | -1.18598800 |
| H | -7.84292200 | 0.81759900  | -1.33548100 |
| C | -4.17442200 | -2.81904800 | 1.33460000  |
| H | -5.22947300 | -2.86684900 | 1.09996900  |
| C | -2.91152700 | 0.89301700  | 4.03943300  |
| H | -3.08093500 | 0.12361300  | 4.78091700  |
| C | -4.11925600 | -2.68100800 | -2.60269000 |
| H | -4.44071300 | -1.69712200 | -2.92147900 |
| C | 6.53472100  | 2.92316200  | -1.53872500 |
| H | 7.61283300  | 2.83884500  | -1.55598600 |
| C | -2.44164700 | -4.15365800 | -1.65636700 |
| C | -2.17937600 | -3.78294600 | 2.33178700  |
| H | -1.71384700 | -4.59044600 | 2.88183600  |
| C | -3.53571800 | -3.84841000 | 2.02545300  |
| H | -4.11048100 | -4.71085200 | 2.33595600  |
| C | 7.19040400  | -2.19087900 | 1.27865100  |
| H | 6.70389500  | -3.02672900 | 1.76386700  |
| C | -4.95699500 | -3.78448400 | -2.67744200 |
| H | -5.95695300 | -3.66472400 | -3.07483800 |
| C | -4.54038000 | -5.05383700 | -2.25640400 |
| H | -5.22366100 | -5.88954300 | -2.33481300 |
| C | 2.16204900  | -5.13799500 | 0.95563800  |
| H | 3.05622300  | -5.37780900 | 1.51509700  |
| C | 3.69794300  | 3.13349400  | -1.50719300 |
| H | 2.61715600  | 3.22133900  | -1.49168400 |
| C | 0.09538300  | -5.87842000 | -0.07758800 |
| H | -0.61696000 | -6.65751600 | -0.31310600 |
| C | -3.26855500 | -5.26245400 | -1.74058700 |
| H | -2.94901700 | -6.24152600 | -1.40817600 |
| C | 9.20359900  | -1.03078100 | 0.55713800  |
| H | 10.28418500 | -1.00477400 | 0.50420000  |
| C | 8.47016500  | 0.00708900  | -0.00022300 |
| H | 8.95627400  | 0.84241300  | -0.48709400 |
| C | 4.49353900  | 4.11538500  | -2.09254100 |
| H | 4.01753300  | 4.97679600  | -2.54113600 |
| C | 8.57162100  | -2.11033500 | 1.18471300  |
| H | 9.17877200  | -2.90136800 | 1.60619100  |
| C | 1.25534200  | -6.14726000 | 0.64499200  |
| H | 1.45441100  | -7.16028200 | 0.96864400  |
| C | 5.88207800  | 4.01458000  | -2.10595700 |
| H | 6.46771600  | 4.79837700  | -2.56766800 |
